# Supplementary material for: Effect of a locust bean gum based gel electrolyte with nanocomposite additives on the performance of a dye-sensitized solar cell
Source: Royal Society of Chemistry journal article supplement (doi:10.1039/d2nj02182j), 2022-01-01
Supplement: d2nj02182j1.pdf [file d2nj02182j1.pdf]

## Effect of Locust Bean Gum based Gel Electrolyte with Nanocomposite Additives on performance of Dye-Sensitized Solar Cell

Abisharani Johnson Mary Leeda Rani,<sup>a</sup> Ahalya Gunasekeran,<sup>b</sup> Devikala Sundaramurthy,<sup>a\*</sup> Anandan Sambandam,<sup>b</sup>

<sup>a</sup> Material Chemistry Laboratory, Department of Chemistry, College of Engineering and Technology, SRM Institute of Science and Technology, SRM Nagar, Kattankulathur 603203, Chengalpattu, Tamil Nadu, India.

<sup>b</sup> Nanomaterials and Solar Energy Conversion Lab, Department of Chemistry, National Institute of Technology, Tiruchirappalli 620015, Tamil Nadu, India.

---

\*Corresponding author mail: [sdevikala@gmail.com](mailto:sdevikala@gmail.com)

### Supporting information

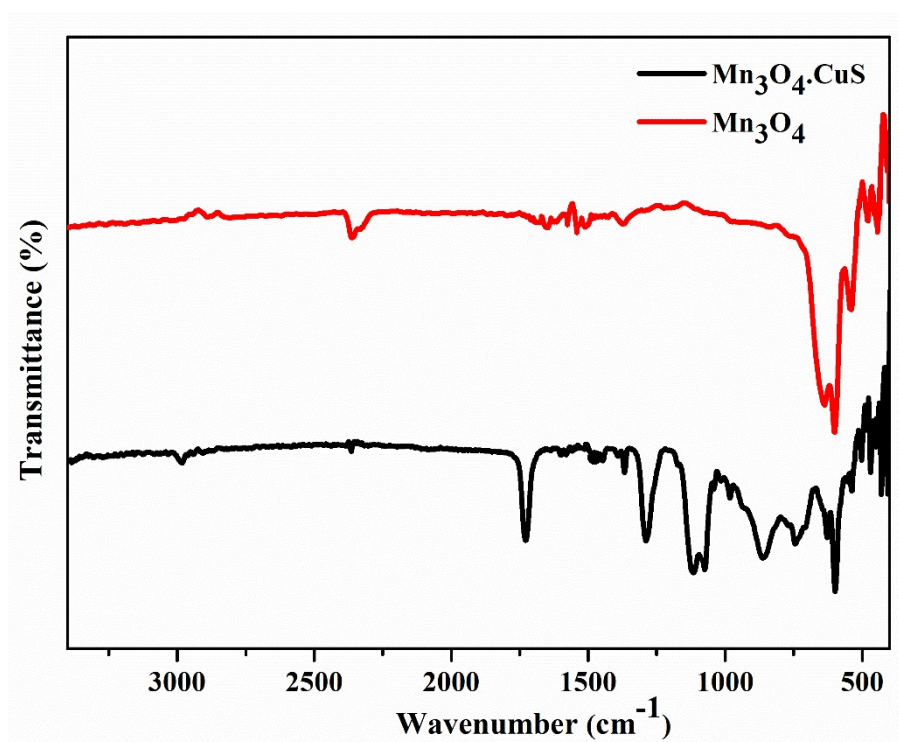

Figure S1. FTIR Spectroscopy of Mn<sub>3</sub>O<sub>4</sub> and Mn<sub>3</sub>O<sub>4</sub>·CuS Nanocomposites.

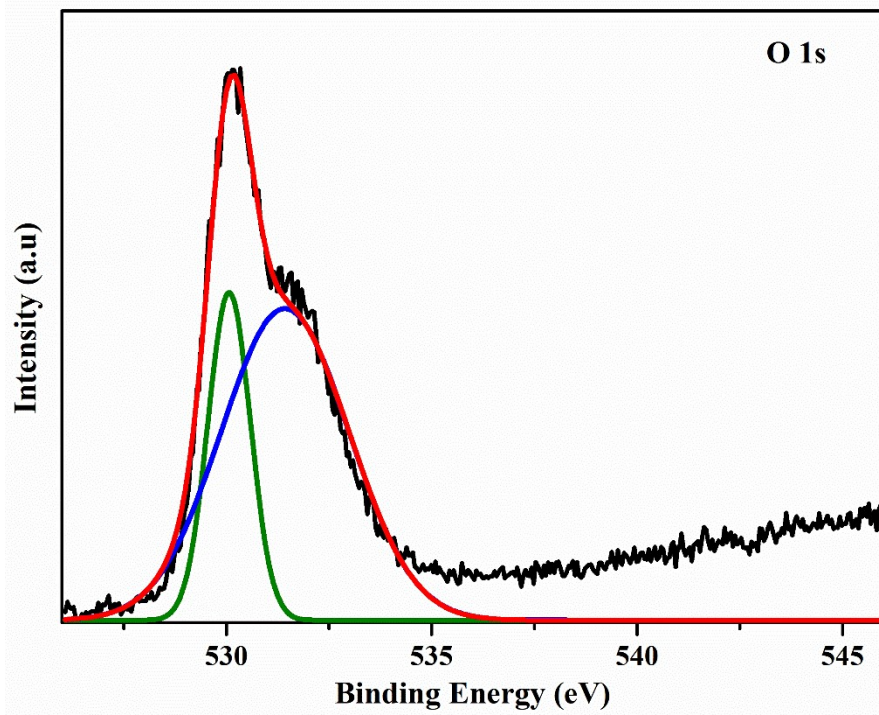

Figure S2a. XPS image of O1s.

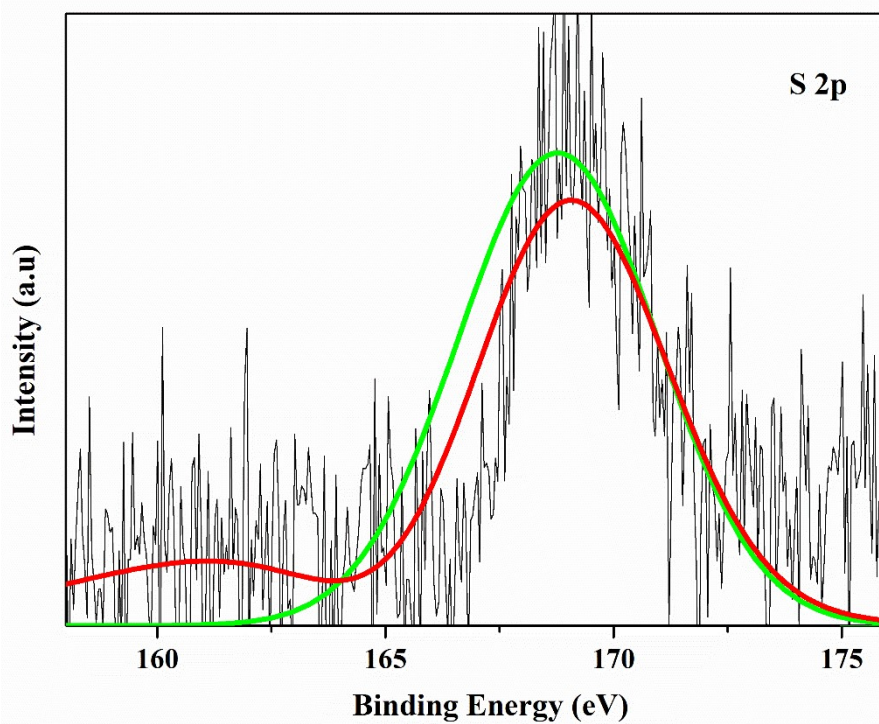

Figure S2b. XPS image of S2p.

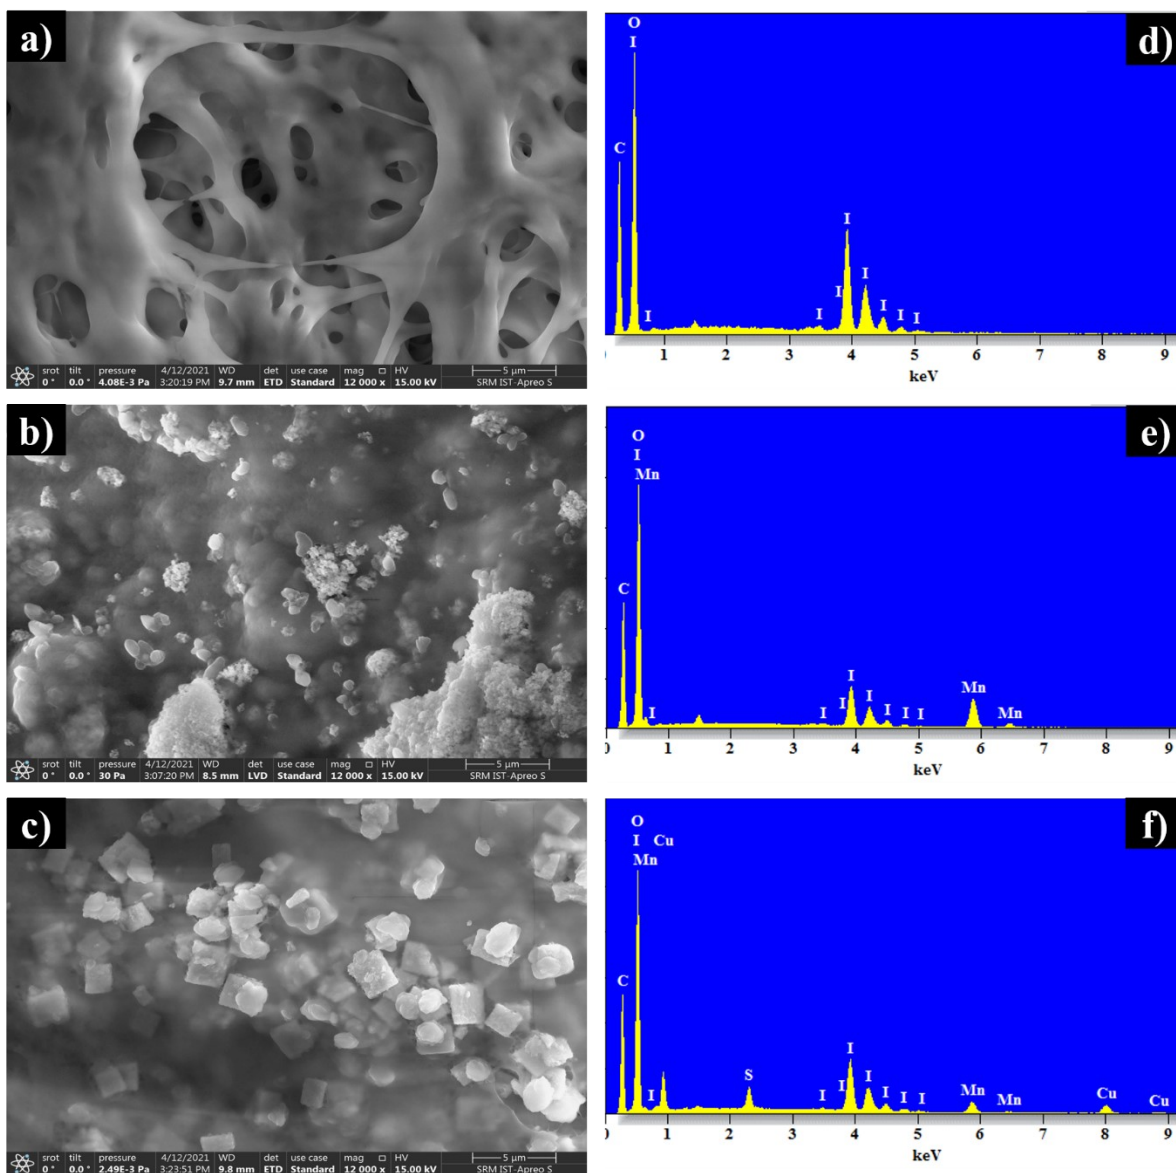

**Figure S3.** SEM images of a) LGE1 b) LGE2 c) LGE3, EDX images of d) LGE1 e) LGE2 f) LGE3.

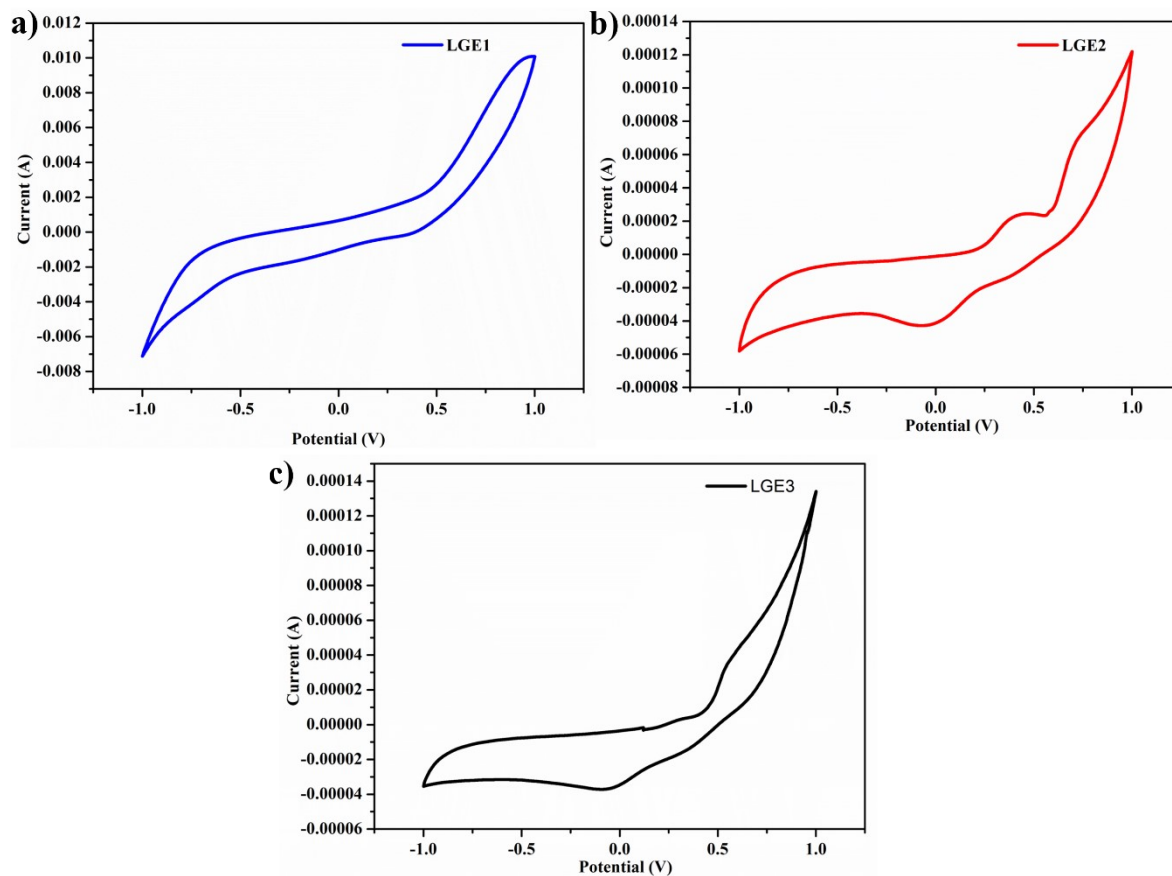

**Figure S4.** Cyclic Voltammetry spectrum of a) LGE1 b) LGE2 c) LGE3.
